# Supplementary material for: Belarusian Healthcare Professionals’ Views on Monkeypox and Vaccine Hesitancy
Source: MDPI journal article supplement (doi:10.3390/vaccines11081368), 2023-08-15
Supplement: s1 [file s1]

**Table S1.** Predictors of MPOX-related Perceived Knowledge of Belarusian Healthcare Professionals Participating in the MPOX Survey, October 2022, (*n* = 144)

1

| Variable                  | Outcome        | Epidemiology | <i>p.</i> | Clinical<br>Presentation | <i>p.</i> | Transmission | <i>p.</i> | Prevention | <i>p.</i>    | Treatment | <i>p.</i>    | Total      | <i>p.</i> |
|---------------------------|----------------|--------------|-----------|--------------------------|-----------|--------------|-----------|------------|--------------|-----------|--------------|------------|-----------|
| Gender                    | Female         | 2.5 ± 0.9    | 0.039     | 2.8 ± 1.0                | 0.127     | 3.0 ± 1.0    | 0.328     | 2.5 ± 0.9  | 0.498        | 2.3 ± 0.9 | 0.133        | 13.1 ± 4.0 | 0.130     |
|                           | Male           | 3.1 ± 1.0    |           | 3.3 ± 1.0                |           | 3.3 ± 1.0    |           | 2.8 ± 1.0  |              | 2.9 ± 1.1 |              | 15.3 ± 4.7 |           |
| Sexual<br>Orientation     | Heterosexual   | 2.6 ± 0.9    | 0.910     | 2.8 ± 1.0                | 0.807     | 3.0 ± 1.0    | 0.477     | 2.6 ± 0.9  | <b>0.045</b> | 2.4 ± 0.9 | 0.103        | 13.2 ± 4.0 | 0.388     |
|                           | Homosexual     | 3.0 ± 0.0    |           | 3.0 ± 0.0                |           | 4.0 ± 0.0    |           | 3.0 ± 0.0  |              | 4.0 ± 0.0 |              | 17.0 ± 0.0 |           |
|                           | Bisexual       | 2.7 ± 0.8    |           | 3.2 ± 0.4                |           | 3.3 ± 0.5    |           | 2.8 ± 0.4  |              | 2.8 ± 0.8 |              | 14.8 ± 1.6 |           |
|                           | Other          | 2.5 ± 1.0    |           | 1.9 ± 2.8                |           | 2.5 ± 1.9    |           | 1.3 ± 0.5  |              | 1.8 ± 1.0 |              | 10.5 ± 5.5 |           |
| Age Group                 | ≤ 31 years-old | 2.5 ± 0.9    | 0.423     | 2.7 ± 0.9                | 0.231     | 2.9 ± 1.0    | 0.293     | 2.6 ± 1.0  | 0.156        | 2.4 ± 0.9 | 0.937        | 13.1 ± 4.2 | 0.998     |
|                           | > 31 years-old | 2.6 ± 0.8    |           | 2.9 ± 1.0                |           | 3.1 ± 1.1    |           | 2.4 ± 0.9  |              | 2.4 ± 0.9 |              | 13.4 ± 3.9 |           |
| Marital Status            | Single         | 2.7 ± 0.8    | 0.654     | 3.2 ± 0.9                | 0.119     | 3.1 ± 0.9    | 0.607     | 2.8 ± 0.9  | 0.397        | 2.8 ± 0.9 | 0.061        | 14.5 ± 3.5 | 0.332     |
|                           | Married        | 2.5 ± 0.9    |           | 2.7 ± 1.0                |           | 2.9 ± 1.1    |           | 2.5 ± 1.0  |              | 2.3 ± 0.9 |              | 13.0 ± 4.1 |           |
|                           | Widowed        | 2.0 ± 0.0    |           | 4.0 ± 0.0                |           | 4.0 ± 0.0    |           | 2.0 ± 0.0  |              | 1.0 ± 0.0 |              | 13.0 ± 0.0 |           |
|                           | Divorced       | 2.5 ± 0.8    |           | 3.0 ± 1.1                |           | 3.0 ± 1.1    |           | 2.5 ± 1.2  |              | 2.2 ± 1.0 |              | 13.2 ± 4.2 |           |
| Having<br>Minors          | No             | 2.6 ± 0.9    | 0.442     | 3.0 ± 1.0                | 0.129     | 3.1 ± 1.0    | 0.212     | 2.6 ± 1.0  | 0.311        | 2.5 ± 1.0 | 0.421        | 13.8 ± 4.2 | 0.090     |
|                           | Yes            | 2.5 ± 0.8    |           | 2.7 ± 0.9                |           | 2.9 ± 1.0    |           | 2.5 ± 0.9  |              | 2.3 ± 0.8 |              | 12.9 ± 3.9 |           |
| Profession                | Medical HCPs   | 2.6 ± 0.9    | 0.958     | 2.9 ± 1.0                | 0.542     | 3.0 ± 1.0    | 0.893     | 2.6 ± 0.9  | 0.479        | 2.4 ± 0.9 | 0.732        | 13.3 ± 4.1 | 0.473     |
|                           | Allied HCPs    | 2.6 ± 0.8    |           | 2.8 ± 0.9                |           | 3.0 ± 1.1    |           | 2.4 ± 1.0  |              | 2.3 ± 0.9 |              | 13.0 ± 3.9 |           |
| Providing<br>Care         | No             | 2.5 ± 0.9    | 0.277     | 2.8 ± 1.0                | 0.806     | 3.0 ± 1.1    | 0.691     | 2.5 ± 1.0  | 0.188        | 2.3 ± 0.9 | 0.086        | 13.1 ± 4.1 | 0.352     |
|                           | Yes            | 2.7 ± 0.7    |           | 2.9 ± 0.9                |           | 2.9 ± 0.9    |           | 2.7 ± 0.8  |              | 2.6 ± 0.9 |              | 13.8 ± 3.7 |           |
| Chronic<br>Illnesses      | No             | 2.6 ± 0.9    | 0.916     | 2.8 ± 1.0                | 0.653     | 2.8 ± 1.0    | 0.065     | 2.6 ± 1.0  | 0.820        | 2.4 ± 0.9 | 0.385        | 13.1 ± 4.3 | 0.776     |
|                           | Yes            | 2.6 ± 0.8    |           | 2.9 ± 0.9                |           | 3.2 ± 1.0    |           | 2.5 ± 0.9  |              | 2.3 ± 0.9 |              | 13.4 ± 3.7 |           |
| Medical<br>Treatments     | No             | 2.6 ± 0.9    | 0.411     | 2.9 ± 1.0                | 0.480     | 3.0 ± 1.0    | 0.645     | 2.6 ± 1.0  | 0.134        | 2.5 ± 0.9 | <b>0.005</b> | 13.5 ± 4.2 | 0.053     |
|                           | Yes            | 2.5 ± 0.8    |           | 2.8 ± 0.9                |           | 2.9 ± 1.0    |           | 2.4 ± 0.8  |              | 2.0 ± 0.8 |              | 12.5 ± 3.4 |           |
| COVID-19<br>Vaccination   | No             | 2.4 ± 1.0    | 0.203     | 2.5 ± 1.1                | 0.095     | 2.7 ± 1.2    | 0.147     | 2.3 ± 1.1  | 0.208        | 2.1 ± 0.9 | <b>0.041</b> | 12.0 ± 4.5 | 0.065     |
|                           | Yes            | 2.6 ± 0.8    |           | 2.9 ± 0.9                |           | 3.0 ± 1.0    |           | 2.6 ± 0.9  |              | 2.4 ± 0.9 |              | 13.6 ± 3.9 |           |
| COVID-19<br>Vaccine Doses | One Dose       | 2.3 ± 1.0    | 0.436     | 2.8 ± 1.3                | 0.663     | 2.8 ± 1.3    | 0.848     | 2.5 ± 1.0  | 0.506        | 1.5 ± 1.0 | 0.301        | 11.8 ± 5.0 | 0.697     |
|                           | Two Doses      | 2.5 ± 0.8    |           | 2.8 ± 0.9                |           | 2.9 ± 1.0    |           | 2.6 ± 0.9  |              | 2.5 ± 0.9 |              | 13.2 ± 3.9 |           |
|                           | Three Doses    | 2.7 ± 0.9    |           | 3.0 ± 1.0                |           | 3.1 ± 1.0    |           | 2.6 ± 0.9  |              | 2.6 ± 0.9 |              | 13.9 ± 3.9 |           |
|                           | Four Doses     | 2.7 ± 0.8    |           | 3.0 ± 1.0                |           | 3.1 ± 1.1    |           | 2.5 ± 0.8  |              | 2.3 ± 0.8 |              | 13.6 ± 3.9 |           |

|                                 |                           |                   |              |                   |                  |                   |                  |                   |                  |                   |              |                     |                  |
|---------------------------------|---------------------------|-------------------|--------------|-------------------|------------------|-------------------|------------------|-------------------|------------------|-------------------|--------------|---------------------|------------------|
|                                 | Five Doses or More        | 3.0 ± 0.8         |              | 3.3 ± 0.5         |                  | 3.3 ± 0.5         |                  | 3.5 ± 1.0         |                  | 2.5 ± 1.0         |              | 15.5 ± 1.3          |                  |
| Influenza Vaccination           | No                        | 2.1 ± 0.9         | <b>0.003</b> | 2.3 ± 1.1         | <b>0.003</b>     | 2.5 ± 1.3         | <b>0.011</b>     | 2.2 ± 1.0         | <b>0.022</b>     | 2.2 ± 1.0         | 0.232        | 11.2 ± 4.8          | <b>0.010</b>     |
|                                 | Yes                       | 2.7 ± 0.8         |              | 3.0 ± 0.9         |                  | 3.1 ± 0.9         |                  | 2.6 ± 0.9         |                  | 2.4 ± 0.9         |              | 13.7 ± 3.7          |                  |
| Last 12 Months                  | No                        | 2.6 ± 0.8         | 0.612        | 3.0 ± 0.8         | 0.289            | 3.2 ± 0.9         | 0.368            | 2.8 ± 0.9         | 0.180            | 2.5 ± 0.9         | 0.675        | 14.0 ± 3.4          | 0.444            |
|                                 | Yes                       | 2.7 ± 0.9         |              | 2.9 ± 0.9         |                  | 3.0 ± 1.0         |                  | 2.5 ± 1.0         |                  | 2.4 ± 0.9         |              | 13.5 ± 3.9          |                  |
| Smallpox Vaccine                | No                        | 2.6 ± 0.8         | 0.768        | 2.8 ± 0.9         | 0.855            | 3.0 ± 1.0         | 0.722            | 2.6 ± 0.9         | 0.217            | 2.4 ± 0.9         | 0.472        | 13.3 ± 4.0          | 0.650            |
|                                 | Yes                       | 2.6 ± 1.0         |              | 2.8 ± 1.1         |                  | 3.0 ± 1.1         |                  | 2.3 ± 1.0         |                  | 2.3 ± 0.9         |              | 13.0 ± 4.4          |                  |
| Undergrad Curriculum            | No                        | 2.5 ± 0.9         | <b>0.011</b> | 2.7 ± 0.9         | <b>0.012</b>     | 2.9 ± 1.0         | <b>0.005</b>     | 2.5 ± 1.0         | 0.147            | 2.3 ± 0.9         | <b>0.023</b> | 12.8 ± 4.0          | <b>0.001</b>     |
|                                 | Yes                       | 2.9 ± 0.8         |              | 3.2 ± 1.0         |                  | 3.4 ± 1.0         |                  | 2.7 ± 0.9         |                  | 2.7 ± 0.9         |              | 15.0 ± 3.7          |                  |
| Utilized Sources                | Ministry of Health        | 2.7 ± 0.9         | 0.095        | 3.0 ± 1.0         | 0.066            | 3.1 ± 1.0         | 0.093            | 2.6 ± 0.9         | 0.438            | 2.5 ± 0.9         | 0.093        | 13.9 ± 3.9          | 0.061            |
|                                 | Public Health Institutes  | 2.9 ± 0.9         | <b>0.012</b> | 3.2 ± 0.8         | <b>0.012</b>     | 3.4 ± 0.9         | <b>0.013</b>     | 2.8 ± 0.9         | 0.128            | 2.6 ± 0.8         | 0.058        | 14.9 ± 3.2          | <b>0.013</b>     |
|                                 | ECDC                      | 3.0 ± 0.7         | <b>0.004</b> | 3.3 ± 0.7         | <b>0.021</b>     | 3.5 ± 0.7         | <b>0.013</b>     | 3.0 ± 0.6         | <b>0.003</b>     | 2.8 ± 0.8         | <b>0.005</b> | 15.6 ± 2.5          | <b>0.002</b>     |
|                                 | US CDC                    | 3.0 ± 0.8         | <b>0.008</b> | 3.2 ± 0.6         | <b>0.044</b>     | 3.4 ± 0.9         | <b>0.027</b>     | 3.1 ± 0.8         | <b>0.002</b>     | 2.8 ± 1.0         | <b>0.010</b> | 15.6 ± 3.0          | <b>0.002</b>     |
|                                 | WHO                       | 2.8 ± 0.7         | <b>0.002</b> | 3.1 ± 0.8         | <b>&lt;0.001</b> | 3.3 ± 0.8         | <b>&lt;0.001</b> | 2.8 ± 0.7         | <b>&lt;0.001</b> | 2.6 ± 0.8         | <b>0.003</b> | 14.5 ± 3.0          | <b>&lt;0.001</b> |
|                                 | Pharmaceutical Industry   | 2.3 ± 0.7         | 0.225        | 2.9 ± 0.9         | 0.957            | 2.8 ± 0.9         | 0.495            | 2.6 ± 0.8         | 0.846            | 2.4 ± 0.7         | 0.937        | 13.0 ± 3.4          | 0.539            |
|                                 | Professional Associations | 2.9 ± 0.8         | <b>0.009</b> | 3.1 ± 0.8         | 0.065            | 3.2 ± 0.9         | 0.063            | 2.8 ± 0.9         | 0.128            | 2.5 ± 0.8         | 0.150        | 14.5 ± 3.4          | <b>0.043</b>     |
|                                 | Scientific Journals       | 2.9 ± 0.8         | <b>0.026</b> | 3.0 ± 0.8         | 0.302            | 3.2 ± 1.0         | 0.120            | 2.9 ± 1.0         | <b>0.008</b>     | 2.8 ± 1.0         | <b>0.008</b> | 14.8 ± 3.9          | <b>0.006</b>     |
|                                 | Social Media              | 2.4 ± 0.9         | <b>0.014</b> | 2.7 ± 0.9         | 0.068            | 2.9 ± 1.0         | 0.239            | 2.5 ± 1.0         | 0.654            | 2.3 ± 0.9         | 0.591        | 12.9 ± 4.0          | 0.068            |
|                                 | News Portals              | 2.7 ± 0.8         | 0.097        | 3.0 ± 0.8         | 0.248            | 3.2 ± 0.9         | 0.058            | 2.8 ± 0.9         | <b>0.030</b>     | 2.6 ± 0.8         | <b>0.025</b> | 14.3 ± 3.3          | <b>0.039</b>     |
| Overall Score: μ ± SD (min-max) |                           | 2.6 ± 0.9 (1 – 5) |              | 2.8 ± 1.0 (1 – 5) |                  | 3.0 ± 1.0 (1 – 5) |                  | 2.5 ± 0.9 (1 – 5) |                  | 2.4 ± 0.9 (1 – 5) |              | 13.3 ± 4.0 (5 – 25) |                  |

Kruskal-Wallis (*H*) test and Mann-Whitney (*U*) test were used with a significance level (*p.*) of ≤ 0.05.

2

**Table S2.** Factual Knowledge of Belarusian Healthcare Professionals Participating in the MPOX Survey, October 2022, (*n* = 144)

3

| Question     |                                                            | Answer             | MPOX VAX<br>Rejection<br>( <i>n</i> = 26) | MPOX VAX<br>Hesitancy<br>( <i>n</i> = 44) | MPOX VAX<br>Acceptance<br>( <i>n</i> = 74) | Total<br>( <i>n</i> = 144) | <i>p.</i>    |
|--------------|------------------------------------------------------------|--------------------|-------------------------------------------|-------------------------------------------|--------------------------------------------|----------------------------|--------------|
| Epidemiology | The incubation period of MPOX ranges between ...           | 3 – 7 days         | 6 (23.1%)                                 | 6 (13.6%)                                 | 10 (13.5%)                                 | 22 (15.3%)                 | 0.454        |
|              |                                                            | <b>7 – 21 days</b> | 13 (50%)                                  | 26 (59.1%)                                | 46 (62.2%)                                 | 85 (59%)                   | 0.555        |
|              |                                                            | 21 – 28 days       | 1 (3.8%)                                  | 6 (13.6%)                                 | 5 (6.8%)                                   | 12 (8.3%)                  | 0.364        |
|              |                                                            | I do not know      | 6 (23.1%)                                 | 6 (13.6%)                                 | 13 (17.6%)                                 | 25 (17.4%)                 | 0.558        |
|              | The case-fatality ratio of MPOX usually ranges between ... | <b>4% and 11%</b>  | 13 (50%)                                  | 23 (52.3%)                                | 50 (67.6%)                                 | 86 (59.7%)                 | 0.140        |
|              |                                                            | 14% and 19%        | 2 (7.7%)                                  | 5 (11.4%)                                 | 6 (8.1%)                                   | 13 (9%)                    | 0.925        |
|              |                                                            | 20% and 30%        | 6 (23.1%)                                 | 4 (9.1%)                                  | 4 (5.4%)                                   | 14 (9.7%)                  | <b>0.039</b> |

|                       |                                                                                                     |                                                         |            |            |            |             |              |
|-----------------------|-----------------------------------------------------------------------------------------------------|---------------------------------------------------------|------------|------------|------------|-------------|--------------|
| Clinical Presentation | MPOX used to be endemic in ...                                                                      | I do not know                                           | 5 (19.2%)  | 12 (27.3%) | 14 (18.9%) | 31 (21.5%)  | 0.538        |
|                       |                                                                                                     | Southeast Asia                                          | 1 (3.8%)   | 2 (4.5%)   | 6 (8.1%)   | 9 (6.3%)    | 0.728        |
|                       |                                                                                                     | <b>Sub-Saharan Africa</b>                               | 20 (76.9%) | 30 (68.2%) | 52 (70.3%) | 102 (70.8%) | 0.731        |
|                       |                                                                                                     | North America                                           | 0 (0%)     | 2 (4.5%)   | 1 (1.4%)   | 3 (2.1%)    | 0.438        |
|                       |                                                                                                     | I do not know                                           | 5 (19.2%)  | 10 (22.7%) | 15 (20.3%) | 30 (20.8%)  | 0.928        |
|                       | Which of the following are symptoms of MPOX infection?<br>(select all that apply)                   | Fever                                                   | 22 (84.6%) | 38 (86.4%) | 63 (85.1%) | 123 (85.4%) | 1.000        |
|                       |                                                                                                     | Chills                                                  | 20 (76.9%) | 17 (38.6%) | 39 (52.7%) | 76 (52.8%)  | <b>0.008</b> |
|                       |                                                                                                     | Headache                                                | 16 (61.5%) | 18 (40.9%) | 38 (51.4%) | 72 (50%)    | 0.235        |
|                       |                                                                                                     | Myalgia                                                 | 13 (50%)   | 18 (40.9%) | 36 (48.6%) | 67 (46.5%)  | 0.664        |
|                       |                                                                                                     | Lymphadenopathy                                         | 19 (73.1%) | 27 (61.4%) | 51 (68.9%) | 97 (67.4%)  | 0.552        |
|                       |                                                                                                     | Fatigue                                                 | 16 (61.5%) | 22 (50%)   | 36 (48.6%) | 74 (51.4%)  | 0.515        |
|                       |                                                                                                     | Respiratory symptoms                                    | 10 (38.5%) | 14 (31.8%) | 26 (35.1%) | 50 (34.7%)  | 0.848        |
|                       |                                                                                                     | Skin and mucosal lesions                                | 24 (92.3%) | 37 (84.1%) | 62 (83.8%) | 123 (85.4%) | 0.569        |
|                       | ... is/are the diagnostic feature(s) of MPOX that distinguish(es) it from smallpox.                 | I do not know                                           | 2 (7.7%)   | 5 (11.4%)  | 9 (12.2%)  | 16 (11.1%)  | 0.938        |
|                       |                                                                                                     | <b>Lymphadenopathy</b>                                  | 14 (53.8%) | 25 (56.8%) | 37 (50%)   | 76 (52.8%)  | 0.768        |
|                       |                                                                                                     | Fever                                                   | 0 (0%)     | 4 (9.1%)   | 1 (1.4%)   | 5 (3.5%)    | 0.081        |
|                       |                                                                                                     | Respiratory symptoms                                    | 7 (26.9%)  | 4 (9.1%)   | 15 (20.3%) | 26 (18.1%)  | 0.119        |
|                       | The possible locations to find MPOX lesions are ...<br>(select all that apply)                      | I do not know                                           | 5 (19.2%)  | 11 (25%)   | 21 (28.4%) | 37 (25.7%)  | 0.651        |
|                       |                                                                                                     | Genitalia                                               | 13 (50%)   | 16 (36.4%) | 37 (50%)   | 66 (45.8%)  | 0.318        |
|                       |                                                                                                     | Anus                                                    | 10 (38.5%) | 10 (22.7%) | 24 (32.4%) | 44 (30.6%)  | 0.340        |
|                       |                                                                                                     | Extremities                                             | 13 (50%)   | 20 (45.5%) | 35 (47.3%) | 68 (47.2%)  | 0.934        |
|                       |                                                                                                     | Chest                                                   | 10 (38.5%) | 19 (43.2%) | 30 (40.5%) | 59 (41%)    | 0.922        |
|                       |                                                                                                     | Back                                                    | 10 (38.5%) | 19 (43.2%) | 26 (35.1%) | 55 (38.2%)  | 0.685        |
|                       |                                                                                                     | Face and Mouth                                          | 13 (50%)   | 26 (59.1%) | 41 (55.4%) | 80 (55.6%)  | 0.760        |
|                       |                                                                                                     | I do not know                                           | 10 (38.5%) | 11 (25%)   | 23 (31.1%) | 44 (30.6%)  | 0.493        |
| Transmission          | MPOX can be transmitted through ...<br>(select all that apply)                                      | contact with respiratory secretions.                    | 13 (50%)   | 28 (63.6%) | 40 (54.1%) | 81 (56.3%)  | 0.465        |
|                       |                                                                                                     | touching objects and fabrics used by someone with MPOX. | 11 (42.3%) | 16 (36.4%) | 28 (37.8%) | 55 (38.2%)  | 0.881        |
|                       |                                                                                                     | direct contact with MPOX rash, scabs or body fluids.    | 22 (84.6%) | 33 (75%)   | 61 (82.4%) | 116 (80.6%) | 0.520        |
|                       |                                                                                                     | I do not know                                           | 1 (3.8%)   | 4 (9.1%)   | 7 (9.5%)   | 12 (8.3%)   | 0.785        |
|                       | Vertical transmission, from a pregnant person to their fetus through placenta, of MPOX is possible. | <b>True</b>                                             | 14 (53.8%) | 18 (40.9%) | 20 (27%)   | 52 (36.1%)  | <b>0.036</b> |
|                       |                                                                                                     | False                                                   | 4 (15.4%)  | 11 (25%)   | 16 (21.6%) | 31 (21.5%)  | 0.639        |

|            |                                                                    |                                                                                                        |            |            |            |             |       |
|------------|--------------------------------------------------------------------|--------------------------------------------------------------------------------------------------------|------------|------------|------------|-------------|-------|
| Prevention | Sexual transmission of MPOX is possible among ...                  | I do not know                                                                                          | 8 (30.8%)  | 15 (34.1%) | 38 (51.4%) | 61 (42.4%)  | 0.078 |
|            |                                                                    | homosexual partners only.                                                                              | 3 (11.5%)  | 6 (13.6%)  | 6 (8.1%)   | 15 (10.4%)  | 0.623 |
|            |                                                                    | <b>both of homo- and heterosexual partners.</b>                                                        | 19 (73.1%) | 25 (56.8%) | 51 (68.9%) | 95 (66%)    | 0.285 |
|            |                                                                    | I do not know                                                                                          | 4 (15.4%)  | 13 (29.5%) | 17 (23%)   | 34 (23.6%)  | 0.396 |
|            | An effective vaccine against MPOX is to date available.            | <b>Ture</b>                                                                                            | 5 (19.2%)  | 9 (20.5%)  | 20 (27%)   | 34 (23.6%)  | 0.607 |
|            |                                                                    | False                                                                                                  | 11 (42.3%) | 21 (47.7%) | 31 (41.9%) | 63 (43.8%)  | 0.815 |
|            |                                                                    | I do not know                                                                                          | 10 (38.5%) | 14 (31.8%) | 23 (31.1%) | 47 (32.6%)  | 0.780 |
|            |                                                                    | should be administered to healthcare professionals caring for MPOX patients.                           | 14 (53.8%) | 29 (65.9%) | 48 (64.9%) | 91 (63.2%)  | 0.547 |
|            |                                                                    | should be administered to laboratory workers dealing with <i>orthopoxviruses</i> samples and cultures. | 10 (38.5%) | 22 (50%)   | 34 (45.9%) | 66 (45.8%)  | 0.645 |
|            |                                                                    | should be administered to individuals with contact/exposure to MPOX.                                   | 13 (50%)   | 24 (54.5%) | 49 (66.2%) | 86 (59.7%)  | 0.245 |
|            |                                                                    | can prevent the onset of the disease if administered until four days after exposure.                   | 9 (34.6%)  | 8 (18.2%)  | 22 (29.7%) | 39 (27.1%)  | 0.250 |
|            |                                                                    | I do not know                                                                                          | 6 (23.1%)  | 13 (29.5%) | 18 (24.3%) | 37 (25.7%)  | 0.776 |
|            | Which vaccine(s) provide(s) cross-immunization against MPOX?       | Chickenpox Vaccine                                                                                     | 2 (7.7%)   | 2 (4.5%)   | 6 (8.1%)   | 10 (6.9%)   | 0.827 |
|            |                                                                    | <b>Smallpox Vaccine</b>                                                                                | 19 (73.1%) | 28 (63.6%) | 55 (74.3%) | 102 (70.8%) | 0.449 |
|            |                                                                    | COVID-19 Vaccine                                                                                       | 0 (0%)     | 0 (0%)     | 1 (1.4%)   | 1 (0.7%)    | 1.000 |
|            |                                                                    | None of the above                                                                                      | 2 (7.7%)   | 5 (11.4%)  | 6 (8.1%)   | 13 (9%)     | 0.925 |
|            |                                                                    | I do not know                                                                                          | 3 (11.5%)  | 9 (20.5%)  | 6 (8.1%)   | 18 (12.5%)  | 0.154 |
| Treatment  | Effective drugs against MPOX are currently available.              | <b>Ture</b>                                                                                            | 4 (15.4%)  | 9 (20.5%)  | 15 (20.3%) | 28 (19.4%)  | 0.846 |
|            |                                                                    | False                                                                                                  | 13 (50%)   | 19 (43.2%) | 37 (50%)   | 69 (47.9%)  | 0.752 |
|            |                                                                    | I do not know                                                                                          | 9 (34.6%)  | 16 (36.4%) | 22 (29.7%) | 47 (32.6%)  | 0.738 |
|            | For severe MPOX cases, ... can be used.<br>(select all that apply) | tecovirimat                                                                                            | 3 (11.5%)  | 4 (9.1%)   | 10 (13.5%) | 17 (11.8%)  | 0.886 |
|            |                                                                    | brincidofovir                                                                                          | 1 (3.8%)   | 2 (4.5%)   | 3 (4.1%)   | 6 (4.2%)    | 1.000 |
|            |                                                                    | cidofovir                                                                                              | 2 (7.7%)   | 0 (0%)     | 9 (12.2%)  | 11 (7.6%)   | 0.031 |
|            |                                                                    | I do not know                                                                                          | 22 (84.6%) | 39 (88.6%) | 59 (79.7%) | 120 (83.3%) | 0.499 |
|            | For most cases, MPOX infection leads to ...                        | <b>mild and self-limiting clinical course.</b>                                                         | 8 (30.8%)  | 17 (38.6%) | 30 (40.5%) | 55 (38.2%)  | 0.676 |
|            |                                                                    | moderate yet life-threatening clinical course.                                                         | 11 (42.3%) | 19 (43.2%) | 32 (43.2%) | 62 (43.1%)  | 0.996 |
|            |                                                                    | fatal and life-threatening clinical course.                                                            | 6 (23.1%)  | 4 (9.1%)   | 3 (4.1%)   | 13 (9%)     | 0.022 |
|            |                                                                    | I do not know                                                                                          | 1 (3.8%)   | 4 (9.1%)   | 9 (12.2%)  | 14 (9.7%)   | 0.563 |

Chi-squared ( $\chi^2$ ) test and Fisher's exact test were used with a significance level ( $p$ .) of  $\leq 0.05$ .

**Table S3.** Predictors of MPOX-related Factual Knowledge of Belarusian Healthcare Professionals Participating in the MPOX Survey, October 2022, ( $n = 144$ )

| Variable                  | Outcome            | Epidemiology | <i>p.</i>    | Clinical<br>Presentation | <i>p.</i>    | Transmission | <i>p.</i>    | Prevention | <i>p.</i>    | Treatment | <i>p.</i>    | Total      | <i>p.</i>    |
|---------------------------|--------------------|--------------|--------------|--------------------------|--------------|--------------|--------------|------------|--------------|-----------|--------------|------------|--------------|
| Gender                    | Female             | 1.9 ± 1.0    | 0.175        | 3.1 ± 1.4                | 0.648        | 2.5 ± 1.1    | 0.058        | 2.1 ± 1.2  | 0.530        | 0.8 ± 0.9 | 0.134        | 10.3 ± 4.0 | 0.105        |
|                           | Male               | 2.4 ± 0.7    |              | 3.4 ± 0.9                |              | 3.3 ± 0.9    |              | 2.4 ± 1.2  |              | 1.3 ± 1.0 |              | 12.6 ± 3.2 |              |
| Sexual<br>Orientation     | Heterosexual       | 1.9 ± 1.0    | 0.593        | 3.1 ± 1.4                | 0.492        | 2.5 ± 1.1    | 0.324        | 2.1 ± 1.2  | 0.469        | 0.8 ± 0.9 | 0.652        | 10.5 ± 3.9 | 0.267        |
|                           | Homosexual         | 1.0 ± 0.0    |              | 2.0 ± 0.0                |              | 2.0 ± 0.0    |              | 1.0 ± 0.0  |              | 0.0 ± 0.0 |              | 6.0 ± 0.0  |              |
|                           | Bisexual           | 2.0 ± 0.9    |              | 3.2 ± 1.8                |              | 3.2 ± 0.8    |              | 2.7 ± 1.5  |              | 1.0 ± 1.1 |              | 12.0 ± 5.0 |              |
|                           | Other              | 1.5 ± 1.0    |              | 2.5 ± 1.0                |              | 2.0 ± 1.2    |              | 2.0 ± 0.8  |              | 0.5 ± 0.6 |              | 8.5 ± 3.8  |              |
| Age Group                 | ≤ 31 years-old     | 1.8 ± 1.0    | 0.253        | 3.1 ± 1.3                | 0.972        | 2.6 ± 0.9    | 0.617        | 2.2 ± 1.2  | 0.232        | 0.8 ± 0.9 | 0.743        | 10.5 ± 3.6 | 0.774        |
|                           | > 31 years-old     | 2.0 ± 1.0    |              | 3.1 ± 1.4                |              | 2.5 ± 1.2    |              | 2.0 ± 1.2  |              | 0.8 ± 1.0 |              | 10.4 ± 4.3 |              |
| Marital Status            | Single             | 1.9 ± 1.1    | 0.441        | 3.1 ± 1.1                | 0.747        | 2.6 ± 1.1    | 0.110        | 2.7 ± 1.0  | <b>0.046</b> | 0.8 ± 0.8 | 0.297        | 11.2 ± 3.3 | 0.753        |
|                           | Married            | 1.9 ± 1.0    |              | 3.1 ± 1.4                |              | 2.5 ± 1.1    |              | 2.0 ± 1.2  |              | 0.8 ± 0.9 |              | 10.2 ± 4.2 |              |
|                           | Widowed            | 3.0 ± 0.0    |              | 4.0 ± 0.0                |              | 3.0 ± 0.0    |              | 2.0 ± 0.0  |              | 0.0 ± 0.0 |              | 12.0 ± 0.0 |              |
|                           | Divorced           | 1.5 ± 0.9    |              | 3.5 ± 1.0                |              | 3.5 ± 0.5    |              | 2.3 ± 1.0  |              | 0.3 ± 0.8 |              | 11.2 ± 2.0 |              |
| Having<br>Minors          | No                 | 1.9 ± 1.1    | 0.641        | 3.2 ± 1.1                | 0.700        | 2.6 ± 1.0    | 0.639        | 2.4 ± 1.2  | <b>0.012</b> | 0.7 ± 0.8 | 0.428        | 10.9 ± 3.3 | 0.349        |
|                           | Yes                | 1.9 ± 1.0    |              | 3.0 ± 1.5                |              | 2.5 ± 1.1    |              | 2.0 ± 1.2  |              | 0.9 ± 1.0 |              | 10.2 ± 4.3 |              |
| Profession                | Medical HCPs       | 2.0 ± 1.0    | 0.090        | 3.2 ± 1.3                | 0.255        | 2.6 ± 1.1    | 0.265        | 2.2 ± 1.2  | 0.459        | 0.9 ± 0.9 | 0.140        | 10.8 ± 3.8 | 0.113        |
|                           | Allied HCPs        | 1.7 ± 0.9    |              | 2.8 ± 1.5                |              | 2.3 ± 1.2    |              | 2.0 ± 1.3  |              | 0.6 ± 0.9 |              | 9.4 ± 4.3  |              |
| Providing<br>Care         | No                 | 1.9 ± 1.0    | 0.788        | 3.0 ± 1.4                | 0.501        | 2.6 ± 1.1    | 0.354        | 2.2 ± 1.3  | 0.744        | 0.9 ± 1.0 | <b>0.010</b> | 10.5 ± 4.1 | 0.536        |
|                           | Yes                | 2.0 ± 0.9    |              | 3.3 ± 1.2                |              | 2.4 ± 1.0    |              | 2.1 ± 1.0  |              | 0.4 ± 0.6 |              | 10.2 ± 3.5 |              |
| Chronic<br>Illnesses      | No                 | 1.8 ± 1.0    | 0.338        | 3.1 ± 1.4                | 0.674        | 2.4 ± 1.2    | 0.226        | 2.2 ± 1.2  | 0.338        | 0.8 ± 0.9 | 0.918        | 10.4 ± 4.2 | 0.932        |
|                           | Yes                | 2.0 ± 0.9    |              | 3.1 ± 1.2                |              | 2.7 ± 1.0    |              | 2.1 ± 1.2  |              | 0.8 ± 0.9 |              | 10.6 ± 3.5 |              |
| Medical<br>Treatments     | No                 | 1.9 ± 1.0    | 0.516        | 3.1 ± 1.3                | 0.379        | 2.5 ± 1.1    | 0.453        | 2.2 ± 1.2  | 0.674        | 0.8 ± 0.9 | 0.680        | 10.5 ± 4.0 | 0.780        |
|                           | Yes                | 1.8 ± 1.0    |              | 2.9 ± 1.4                |              | 2.7 ± 1.0    |              | 2.1 ± 1.2  |              | 0.9 ± 0.9 |              | 10.3 ± 3.7 |              |
| COVID-19<br>Vaccination   | No                 | 1.9 ± 1.0    | 0.761        | 2.8 ± 1.4                | 0.237        | 2.4 ± 1.2    | 0.560        | 1.8 ± 1.2  | 0.102        | 0.8 ± 0.8 | 0.939        | 9.6 ± 3.8  | 0.235        |
|                           | Yes                | 1.9 ± 1.0    |              | 3.2 ± 1.3                |              | 2.6 ± 1.1    |              | 2.2 ± 1.2  |              | 0.9 ± 1.0 |              | 10.7 ± 4.0 |              |
| COVID-19<br>Vaccine Doses | One Dose           | 1.5 ± 0.6    | 0.148        | 4.0 ± 0.8                | 0.536        | 2.5 ± 0.6    | 0.675        | 2.8 ± 1.0  | 0.326        | 0.0 ± 0.0 | 0.285        | 10.8 ± 1.3 | 0.863        |
|                           | Two Doses          | 1.8 ± 1.0    |              | 3.0 ± 1.4                |              | 2.5 ± 1.2    |              | 2.1 ± 1.3  |              | 1.0 ± 1.1 |              | 10.4 ± 4.3 |              |
|                           | Three Doses        | 1.9 ± 1.1    |              | 3.3 ± 1.3                |              | 2.8 ± 1.0    |              | 2.4 ± 1.2  |              | 0.8 ± 0.9 |              | 11.1 ± 4.0 |              |
|                           | Four Doses         | 2.1 ± 1.0    |              | 3.1 ± 1.4                |              | 2.5 ± 1.1    |              | 1.8 ± 1.1  |              | 0.7 ± 0.7 |              | 10.3 ± 3.8 |              |
|                           | Five Doses or More | 2.8 ± 0.5    |              | 2.8 ± 1.0                |              | 2.3 ± 0.5    |              | 2.5 ± 1.0  |              | 0.8 ± 0.5 |              | 11.0 ± 2.7 |              |
| Influenza                 | No                 | 1.5 ± 1.0    | <b>0.017</b> | 2.3 ± 1.5                | <b>0.002</b> | 2.0 ± 1.3    | <b>0.006</b> | 1.7 ± 1.3  | <b>0.035</b> | 0.6 ± 0.8 | <b>0.240</b> | 8.0 ± 4.7  | <b>0.004</b> |

|                                       |                           |                   |                  |                   |              |                   |              |                   |                  |                   |              |                     |                  |
|---------------------------------------|---------------------------|-------------------|------------------|-------------------|--------------|-------------------|--------------|-------------------|------------------|-------------------|--------------|---------------------|------------------|
| Vaccination                           | Yes                       | 2.0 ± 1.0         |                  | 3.3 ± 1.2         |              | 2.7 ± 1.0         |              | 2.3 ± 1.2         |                  | 0.8 ± 0.9         |              | 11.0 ± 3.6          |                  |
| Last 12 Months                        | No                        | 2.0 ± 0.9         | 0.951            | 3.1 ± 1.3         | 0.230        | 2.7 ± 1.1         | 0.947        | 2.2 ± 1.1         | 0.421            | 0.9 ± 1.0         | 0.671        | 10.9 ± 3.5          | 0.657            |
|                                       | Yes                       | 2.0 ± 1.0         |                  | 3.4 ± 1.2         |              | 2.7 ± 1.0         |              | 2.3 ± 1.2         |                  | 0.8 ± 0.9         |              | 11.2 ± 3.6          |                  |
| Smallpox Vaccine                      | No                        | 1.9 ± 1.0         | 0.519            | 3.1 ± 1.3         | 0.556        | 2.5 ± 1.0         | 0.344        | 2.2 ± 1.2         | 0.811            | 0.8 ± 1.0         | 0.567        | 10.6 ± 3.9          | 0.947            |
|                                       | Yes                       | 1.8 ± 1.1         |                  | 2.9 ± 1.6         |              | 2.6 ± 1.3         |              | 2.1 ± 1.2         |                  | 0.7 ± 0.7         |              | 10.0 ± 4.1          |                  |
| Undergrad Curriculum                  | No                        | 1.8 ± 1.0         | 0.207            | 3.0 ± 1.4         | 0.541        | 2.5 ± 1.1         | 0.609        | 2.1 ± 1.2         | 0.111            | 0.7 ± 0.9         | 0.057        | 10.2 ± 4.0          | 0.127            |
|                                       | Yes                       | 2.1 ± 1.0         |                  | 3.3 ± 1.8         |              | 2.7 ± 1.0         |              | 2.5 ± 1.3         |                  | 1.1 ± 1.0         |              | 11.6 ± 3.6          |                  |
| Utilized Sources                      | Ministry of Health        | 1.9 ± 1.0         | 0.970            | 3.1 ± 1.4         | 0.680        | 2.6 ± 1.2         | 0.350        | 2.2 ± 1.1         | 0.611            | 0.8 ± 1.0         | 0.850        | 10.7 ± 4.1          | 0.359            |
|                                       | Public Health Institutes  | 1.9 ± 1.0         | 0.831            | 3.3 ± 1.3         | 0.407        | 2.8 ± 1.1         | 0.133        | 2.3 ± 1.1         | 0.298            | 0.8 ± 0.8         | 0.456        | 11.1 ± 3.9          | 0.328            |
|                                       | ECDC                      | 2.3 ± 1.2         | <b>0.022</b>     | 3.3 ± 1.1         | 0.395        | 3.1 ± 0.8         | <b>0.008</b> | 2.6 ± 1.0         | <b>0.036</b>     | 0.8 ± 0.8         | 0.493        | 12.1 ± 3.8          | <b>0.028</b>     |
|                                       | US CDC                    | 2.5 ± 1.1         | <b>&lt;0.001</b> | 3.8 ± 0.8         | <b>0.004</b> | 3.1 ± 0.8         | <b>0.011</b> | 3.0 ± 0.9         | <b>&lt;0.001</b> | 0.9 ± 0.8         | 0.404        | 13.2 ± 3.0          | <b>&lt;0.001</b> |
|                                       | WHO                       | 2.1 ± 1.0         | <b>0.004</b>     | 3.4 ± 1.2         | <b>0.005</b> | 2.8 ± 1.0         | <b>0.006</b> | 2.5 ± 1.1         | <b>&lt;0.001</b> | 0.9 ± 1.1         | 0.315        | 11.6 ± 3.7          | <b>&lt;0.001</b> |
|                                       | Pharmaceutical Industry   | 1.0 ± 0.9         | <b>0.005</b>     | 3.4 ± 1.0         | 0.514        | 2.6 ± 1.0         | 0.980        | 2.1 ± 1.1         | 0.977            | 0.2 ± 0.4         | <b>0.015</b> | 9.3 ± 1.9           | 0.176            |
|                                       | Professional Associations | 2.0 ± 1.0         | 0.314            | 3.4 ± 1.1         | 0.120        | 2.7 ± 0.9         | 0.633        | 2.2 ± 1.2         | 0.500            | 0.8 ± 0.9         | 0.949        | 11.1 ± 3.2          | 0.259            |
|                                       | Scientific Journals       | 1.9 ± 1.1         | 0.629            | 3.1 ± 1.1         | 0.775        | 2.7 ± 1.0         | 0.282        | 2.5 ± 1.2         | 0.074            | 0.8 ± 0.8         | 0.490        | 11.1 ± 4.1          | 0.299            |
|                                       | Social Media              | 1.8 ± 1.0         | 0.259            | 3.1 ± 1.3         | 0.528        | 2.6 ± 1.0         | 0.693        | 2.2 ± 1.3         | 0.337            | 0.8 ± 1.0         | 0.763        | 10.5 ± 3.9          | 0.878            |
|                                       | News Portals              | 2.0 ± 1.0         | 0.397            | 3.3 ± 1.2         | 0.271        | 2.7 ± 0.8         | 0.459        | 2.3 ± 1.2         | 0.326            | 0.8 ± 1.0         | 0.544        | 11.0 ± 3.3          | 0.361            |
| Overall Score: $\mu \pm SD$ (min-max) |                           | 1.9 ± 1.0 (0 – 3) |                  | 3.1 ± 1.3 (0 – 5) |              | 2.5 ± 1.1 (0 – 4) |              | 2.1 ± 1.2 (0 – 4) |                  | 0.8 ± 0.9 (0 – 4) |              | 10.5 ± 3.9 (0 – 20) |                  |

Kruskal-Wallis ( $H$ ) test and Mann-Whitney ( $U$ ) test were used with a significance level ( $p.$ ) of  $\leq 0.05$ .

**Table S4.** Predictors of MPOX Vaccine-related Perceptions and Acceptance of Belarusian Healthcare Professionals Participating in the MPOX Survey, October 2022, ( $n = 144$ )

7

| Variable               | Outcome            | Perceived Susceptibility | <i>p</i> . | Perceived Severity | <i>p</i> .   | Perceived Benefits | <i>p</i> .   | Perceived Barriers | <i>p</i> . | Cues to Action | <i>p</i> .       | Acceptance | <i>p</i> .   |
|------------------------|--------------------|--------------------------|------------|--------------------|--------------|--------------------|--------------|--------------------|------------|----------------|------------------|------------|--------------|
| Gender                 | Female             | 8.1 ± 2.4                | 0.096      | 8.9 ± 2.3          | 0.215        | 10.5 ± 2.6         | 0.286        | 9.5 ± 2.4          | 0.155      | 10.1 ± 2.3     | 0.081            | 3.4 ± 1.1  | 0.841        |
|                        | Male               | 6.5 ± 2.6                |            | 10.0 ± 2.1         |              | 11.4 ± 2.6         |              | 11.0 ± 2.6         |            | 11.4 ± 2.6     |                  | 3.4 ± 1.1  |              |
| Sexual Orientation     | Heterosexual       | 8.0 ± 2.5                | 0.749      | 9.0 ± 2.3          | 0.122        | 10.6 ± 2.5         | 0.931        | 9.7 ± 2.4          | 0.485      | 10.1 ± 2.3     | 0.551            | 3.4 ± 1.1  | 0.721        |
|                        | Homosexual         | 9.0 ± 0.0                |            | 11.0 ± 0.0         |              | 10.0 ± 0.0         |              | 11.0 ± 0.0         |            | 9.0 ± 0.0      |                  | 4.0 ± 0.0  |              |
|                        | Bisexual           | 8.3 ± 2.8                |            | 8.0 ± 1.3          |              | 10.3 ± 4.1         |              | 9.2 ± 2.6          |            | 10.5 ± 3.0     |                  | 3.3 ± 1.5  |              |
|                        | Other              | 7.0 ± 2.2                |            | 6.7 ± 2.8          |              | 9.3 ± 4.2          |              | 7.8 ± 3.6          |            | 11.5 ± 3.3     |                  | 4.0 ± 1.2  |              |
| Age Group              | ≤ 31 years-old     | 8.1 ± 2.3                | 0.582      | 8.7 ± 2.2          | 0.097        | 11.0 ± 2.4         | 0.052        | 9.8 ± 2.4          | 0.418      | 10.7 ± 2.1     | <b>0.005</b>     | 3.6 ± 1.0  | 0.072        |
|                        | > 31 years-old     | 7.9 ± 2.7                |            | 9.3 ± 2.4          |              | 10.1 ± 2.8         |              | 9.4 ± 2.5          |            | 9.6 ± 2.6      |                  | 3.2 ± 1.1  |              |
| Marital Status         | Single             | 8.1 ± 2.2                | 0.354      | 8.7 ± 1.9          | <b>0.049</b> | 10.2 ± 2.7         | <b>0.031</b> | 9.9 ± 2.2          | 0.246      | 10.6 ± 2.4     | 0.079            | 3.5 ± 1.3  | <b>0.009</b> |
|                        | Married            | 8.0 ± 2.5                |            | 9.2 ± 2.3          |              | 10.8 ± 2.4         |              | 9.6 ± 2.5          |            | 10.2 ± 2.3     |                  | 3.5 ± 1.0  |              |
|                        | Widowed            | 5.0 ± 0.0                |            | 8.0 ± 0.0          |              | 15.0 ± 0.0         |              | 11.0 ± 0.0         |            | 15.0 ± 0.0     |                  | 4.0 ± 0.0  |              |
|                        | Divorced           | 6.7 ± 2.7                |            | 6.3 ± 2.5          |              | 7.3 ± 3.7          |              | 8.2 ± 1.3          |            | 8.3 ± 3.0      |                  | 1.8 ± 0.8  |              |
| Having Minors          | No                 | 8.0 ± 2.5                | 0.960      | 8.8 ± 2.4          | 0.449        | 11.1 ± 2.6         | <b>0.021</b> | 9.8 ± 2.5          | 0.451      | 10.6 ± 2.4     | 0.143            | 3.6 ± 1.1  | 0.093        |
|                        | Yes                | 8.0 ± 2.5                |            | 9.1 ± 2.3          |              | 10.2 ± 2.6         |              | 9.5 ± 2.4          |            | 9.9 ± 2.3      |                  | 3.3 ± 1.1  |              |
| Profession             | Medical HCPs       | 8.0 ± 2.5                | 0.683      | 8.8 ± 2.3          | <b>0.040</b> | 10.8 ± 2.6         | <b>0.022</b> | 9.7 ± 2.4          | 0.799      | 10.4 ± 2.3     | <b>0.015</b>     | 3.5 ± 1.0  | 0.068        |
|                        | Allied HCPs        | 7.8 ± 2.4                |            | 9.6 ± 2.3          |              | 10.0 ± 2.6         |              | 9.5 ± 2.7          |            | 9.3 ± 2.6      |                  | 3.1 ± 1.2  |              |
| Providing Care         | No                 | 7.9 ± 2.5                | 0.229      | 9.0 ± 2.3          | 0.455        | 10.9 ± 2.3         | <b>0.026</b> | 9.7 ± 2.3          | 0.716      | 10.3 ± 2.2     | 0.159            | 3.4 ± 1.1  | 0.295        |
|                        | Yes                | 8.3 ± 2.5                |            | 8.7 ± 2.1          |              | 9.5 ± 3.2          |              | 9.3 ± 2.8          |            | 9.7 ± 2.8      |                  | 3.6 ± 1.1  |              |
| Chronic Illnesses      | No                 | 7.7 ± 2.7                | 0.064      | 8.8 ± 2.4          | 0.323        | 10.8 ± 2.7         | 0.235        | 9.7 ± 2.5          | 0.654      | 10.3 ± 2.4     | 0.304            | 3.5 ± 1.1  | 0.150        |
|                        | Yes                | 8.4 ± 2.1                |            | 9.2 ± 2.1          |              | 10.3 ± 2.6         |              | 9.5 ± 2.4          |            | 10.0 ± 2.3     |                  | 3.3 ± 1.0  |              |
| Medical Treatments     | No                 | 7.8 ± 2.4                | 0.174      | 8.7 ± 2.2          | <b>0.046</b> | 10.5 ± 2.5         | 0.296        | 9.8 ± 2.3          | 0.336      | 10.2 ± 2.4     | 0.795            | 3.4 ± 1.1  | 0.937        |
|                        | Yes                | 8.6 ± 2.7                |            | 9.6 ± 2.4          |              | 11.0 ± 2.9         |              | 9.2 ± 2.9          |            | 10.3 ± 2.3     |                  | 3.4 ± 1.0  |              |
| COVID-19 Vaccination   | No                 | 7.7 ± 2.2                | 0.405      | 8.8 ± 2.4          | 0.540        | 10.0 ± 2.9         | 0.050        | 9.7 ± 2.3          | 0.779      | 8.6 ± 2.4      | <b>&lt;0.001</b> | 3.0 ± 1.2  | 0.057        |
|                        | Yes                | 8.0 ± 2.5                |            | 9.0 ± 2.3          |              | 10.8 ± 2.5         |              | 9.6 ± 2.5          |            | 10.6 ± 2.2     |                  | 3.5 ± 1.0  |              |
| COVID-19 Vaccine Doses | One Dose           | 7.8 ± 1.3                | 0.510      | 9.3 ± 2.5          | 0.776        | 10.5 ± 1.3         | 0.092        | 11.5 ± 1.7         | 0.332      | 10.3 ± 2.2     | 0.709            | 3.5 ± 1.3  | 0.885        |
|                        | Two Doses          | 7.8 ± 2.0                |            | 8.8 ± 2.2          |              | 10.4 ± 2.2         |              | 9.5 ± 2.8          |            | 10.6 ± 1.7     |                  | 3.5 ± 0.8  |              |
|                        | Three Doses        | 8.2 ± 2.6                |            | 9.0 ± 2.3          |              | 10.5 ± 3.0         |              | 9.4 ± 2.3          |            | 10.6 ± 2.5     |                  | 3.5 ± 1.2  |              |
|                        | Four Doses         | 8.6 ± 3.4                |            | 9.6 ± 2.4          |              | 12.1 ± 1.9         |              | 9.9 ± 2.4          |            | 10.7 ± 2.6     |                  | 3.6 ± 0.9  |              |
|                        | Five Doses or More | 6.8 ± 2.2                |            | 8.3 ± 2.2          |              | 9.8 ± 3.3          |              | 9.5 ± 2.6          |            | 9.3 ± 2.2      |                  | 3.8 ± 1.9  |              |
| Influenza Vaccination  | No                 | 7.9 ± 3.1                | 0.805      | 8.8 ± 3.2          | 0.814        | 9.6 ± 2.7          | <b>0.007</b> | 9.2 ± 2.8          | 0.367      | 8.3 ± 2.4      | <b>&lt;0.001</b> | 2.9 ± 1.1  | <b>0.003</b> |
|                        | Yes                | 8.0 ± 2.3                |            | 9.0 ± 2.1          |              | 10.8 ± 2.6         |              | 9.7 ± 2.4          |            | 10.6 ± 2.1     |                  | 3.5 ± 1.0  |              |



|                                              |                           |                    |       |                    |       |                     |              |                    |              |                     |              |                   |              |
|----------------------------------------------|---------------------------|--------------------|-------|--------------------|-------|---------------------|--------------|--------------------|--------------|---------------------|--------------|-------------------|--------------|
| Last 12 Months                               | No                        | 8.1 ± 2.0          | 0.847 | 9.3 ± 1.8          | 0.069 | 10.8 ± 2.1          | 0.470        | 9.8 ± 2.7          | 0.484        | 10.2 ± 2.1          | 0.108        | 3.5 ± 1.0         | 0.787        |
|                                              | Yes                       | 7.9 ± 2.6          |       | 8.8 ± 2.2          |       | 10.8 ± 2.8          |              | 9.7 ± 2.1          |              | 10.9 ± 2.1          |              | 3.6 ± 1.1         |              |
| Smallpox Vaccine                             | No                        | 8.1 ± 2.4          | 0.057 | 8.8 ± 2.2          | 0.124 | 10.7 ± 2.4          | 0.878        | 9.8 ± 2.3          | 0.096        | 10.3 ± 2.3          | 0.502        | 3.5 ± 1.0         | 0.104        |
|                                              | Yes                       | 7.3 ± 2.6          |       | 9.7 ± 2.6          |       | 10.2 ± 3.5          |              | 8.7 ± 2.8          |              | 9.9 ± 2.6           |              | 3.1 ± 1.2         |              |
| Undergrad Curriculum                         | No                        | 8.0 ± 2.5          | 0.591 | 8.9 ± 2.3          | 0.757 | 10.6 ± 2.6          | 0.984        | 9.6 ± 2.5          | 0.686        | 10.2 ± 2.4          | 0.545        | 3.5 ± 1.1         | 0.491        |
|                                              | Yes                       | 7.7 ± 2.3          |       | 9.0 ± 2.2          |       | 10.5 ± 2.6          |              | 9.8 ± 2.3          |              | 10.1 ± 2.4          |              | 3.3 ± 1.1         |              |
| Utilized Sources                             | Ministry of Health        | 8.1 ± 2.2          | 0.770 | 9.0 ± 2.2          | 0.621 | 10.9 ± 2.5          | 0.220        | 9.7 ± 2.3          | 0.753        | 10.4 ± 2.2          | 0.576        | 3.5 ± 1.1         | 0.170        |
|                                              | Public Health Institutes  | 7.6 ± 2.4          | 0.411 | 8.4 ± 2.3          | 0.249 | 10.1 ± 3.1          | 0.633        | 9.9 ± 2.5          | 0.465        | 10.0 ± 2.1          | 0.282        | 3.3 ± 1.2         | 0.348        |
|                                              | ECDC                      | 8.5 ± 3.0          | 0.160 | 9.0 ± 1.7          | 0.864 | 11.5 ± 1.7          | 0.053        | 10.5 ± 2.1         | <b>0.045</b> | 10.7 ± 1.4          | 0.343        | 3.5 ± 1.1         | 0.705        |
|                                              | US CDC                    | 8.0 ± 2.7          | 0.857 | 8.9 ± 2.0          | 0.785 | 11.6 ± 1.7          | <b>0.036</b> | 9.8 ± 1.9          | 0.866        | 10.4 ± 2.2          | 0.439        | 3.6 ± 1.0         | 0.361        |
|                                              | WHO                       | 7.9 ± 2.5          | 0.721 | 8.7 ± 2.0          | 0.154 | 10.4 ± 2.6          | 0.303        | 9.8 ± 2.4          | 0.308        | 10.1 ± 2.3          | 0.998        | 3.4 ± 1.1         | 0.872        |
|                                              | Pharmaceutical Industry   | 7.7 ± 1.9          | 0.564 | 9.6 ± 2.8          | 0.371 | 10.5 ± 2.1          | 0.513        | 10.9 ± 1.7         | 0.063        | 10.6 ± 2.0          | 0.943        | 3.6 ± 1.0         | 0.706        |
|                                              | Professional Associations | 7.3 ± 2.6          | 0.110 | 8.5 ± 2.5          | 0.119 | 9.9 ± 2.8           | 0.055        | 9.7 ± 2.0          | 0.912        | 10.2 ± 2.0          | 0.712        | 3.3 ± 1.2         | 0.554        |
|                                              | Scientific Journals       | 8.5 ± 2.5          | 0.124 | 8.7 ± 2.2          | 0.324 | 10.3 ± 3.0          | 0.855        | 9.9 ± 2.7          | 0.203        | 10.1 ± 2.2          | 0.942        | 3.5 ± 0.9         | 0.507        |
|                                              | Social Media              | 8.2 ± 2.4          | 0.160 | 9.1 ± 2.2          | 0.496 | 10.7 ± 2.3          | 0.798        | 9.7 ± 2.3          | 0.636        | 10.5 ± 2.0          | <b>0.023</b> | 3.6 ± 1.0         | <b>0.021</b> |
|                                              | News Portals              | 8.1 ± 2.5          | 0.528 | 8.9 ± 2.0          | 0.611 | 10.0 ± 2.6          | 0.066        | 9.9 ± 2.5          | 0.478        | 9.8 ± 2.3           | 0.200        | 3.5 ± 1.1         | 0.347        |
| Overall Score: $\mu \pm \text{SD}$ (min-max) |                           | 8.0 ± 2.5 (3 – 15) |       | 8.9 ± 2.3 (3 – 15) |       | 10.6 ± 2.6 (3 – 15) |              | 9.6 ± 2.4 (2 – 10) |              | 10.2 ± 2.4 (3 – 15) |              | 3.4 ± 1.1 (1 – 5) |              |

Kruskal-Wallis ( $H$ ) test and Mann-Whitney ( $U$ ) test were used with a significance level ( $p$ .) of  $\leq 0.05$ .
